# Supplementary material for: A light-switching pyrene probe to detect phase-separated biomolecules
Source: PubMed Central journal article supplement — iScience. 2021 Jul 15;24(8):102865. doi: 10.1016/j.isci.2021.102865 (PMC8346672; doi:10.1016/j.isci.2021.102865), 2021-07-15
Supplement: mmc1.pdf [file mmc1.pdf]

**Supplemental information**

**A light-switching pyrene probe to detect  
phase-separated biomolecules**

**Masaharu Hazawa, Shogo Amemori, Yoshio Nishiyama, Yoshihiro Iga, Yuki Iwashima, Akiko Kobayashi, Hirohisa Nagatani, Motohiro Mizuno, Kenji Takahashi, and Richard W. Wong**

SUPPLEMENTAL INFORMATION

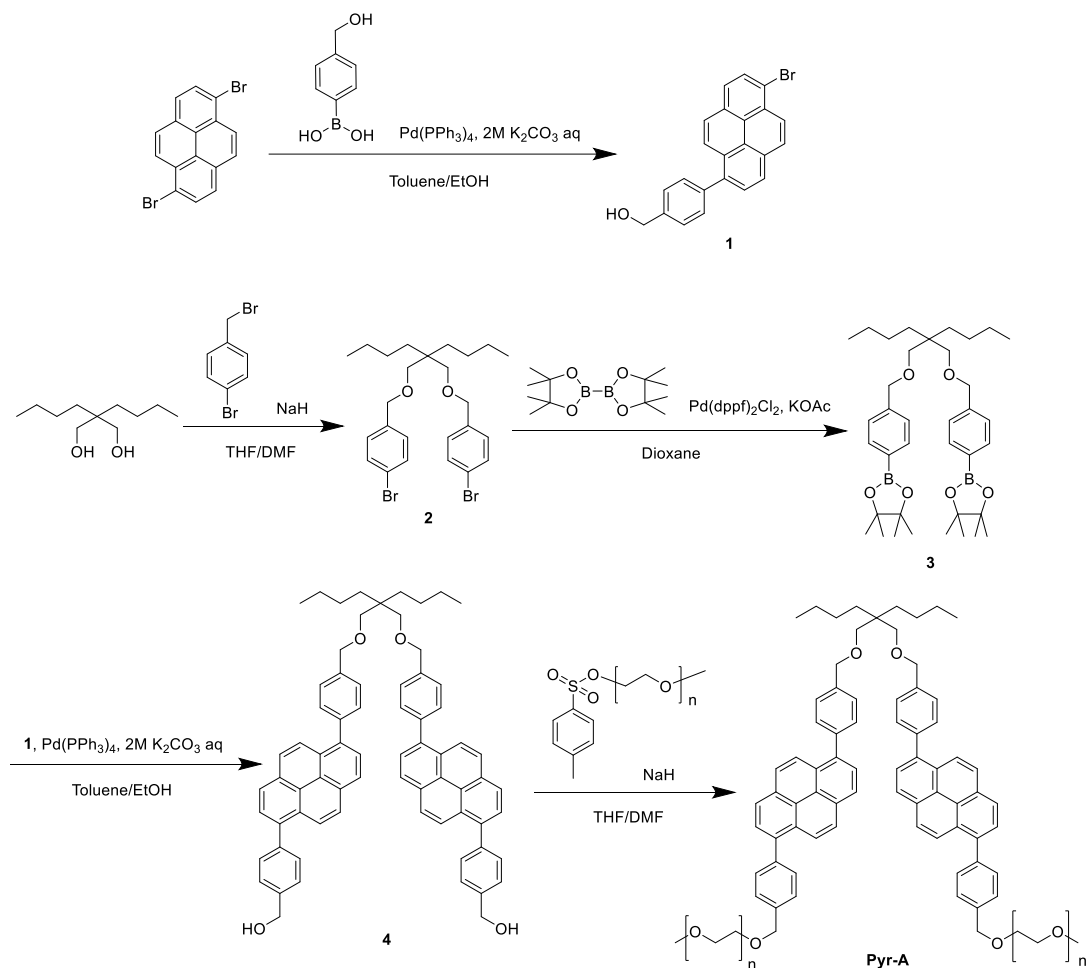

Scheme S1. Synthetic route of Pyr-A, related to Figure 2 and STAR Methods.

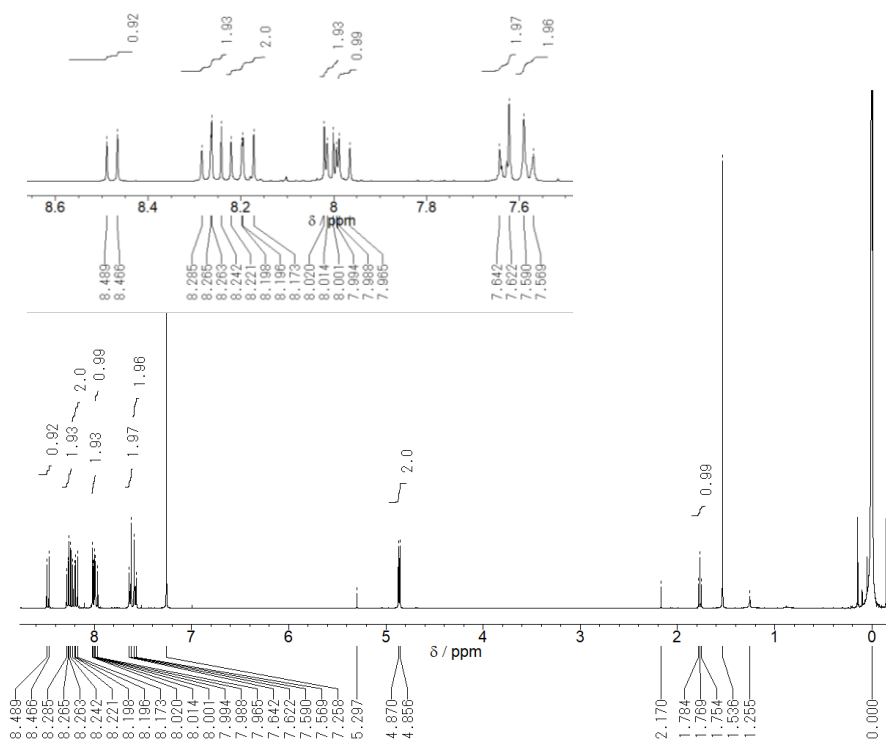

**Data S1. <sup>1</sup>H NMR spectrum (400 MHz, CDCl<sub>3</sub>, TMS standard) of 1, related to Scheme S1.** <sup>1</sup>H NMR (400 MHz, CDCl<sub>3</sub>, TMS standard): δ (ppm) 1.77 (t, *J* = 5.9 Hz, 1 H, OH), 4.86 (t, *J* = 5.9 Hz, 2 H, CH<sub>2</sub>), 7.58 (d, *J* = 8.3 Hz, 2 H, ArH), 7.63 (d, *J* = 8.3 Hz, 2 H, ArH), 7.98 (d, *J* = 9.3 Hz, 1 H, ArH), 8.00 (d, *J* = 8.3 Hz, 1 H, ArH), 8.01 (d, *J* = 7.9 Hz, 1 H, ArH), 8.18 (d, *J* = 9.3 Hz, 1 H, ArH), 8.21 (d, *J* = 9.2 Hz, 1 H, ArH), 8.25 (d, *J* = 8.3 Hz, 1 H, ArH), 8.27 (d, *J* = 7.9 Hz, 1 H, ArH), 8.48 (d, *J* = 9.2 Hz, 1 H, ArH).

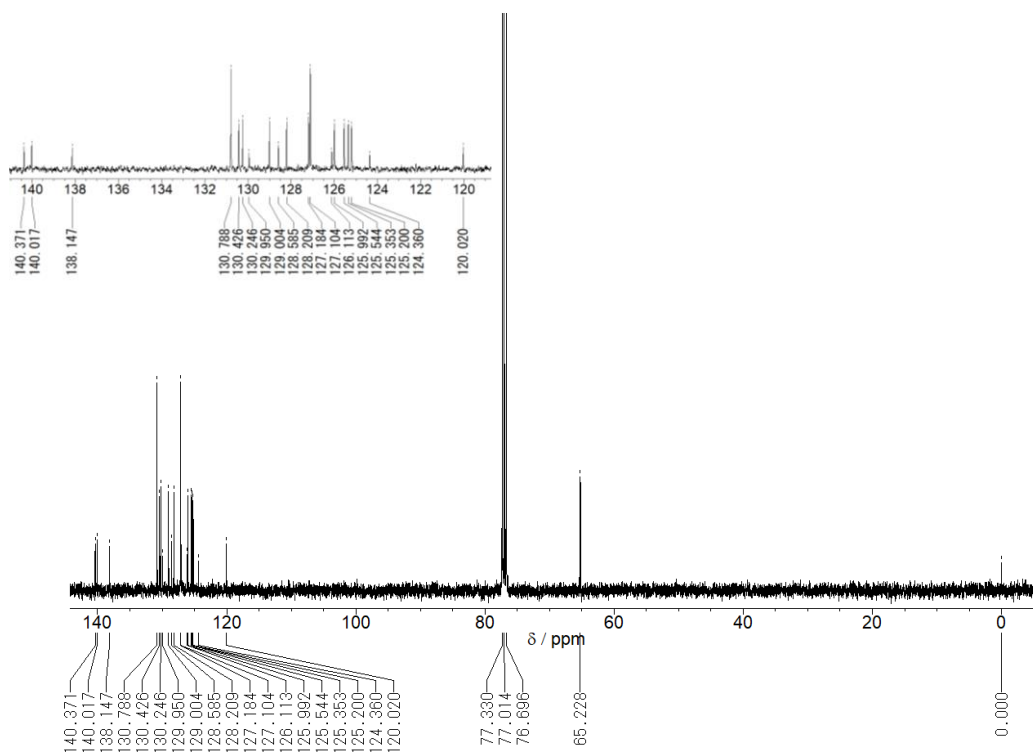

**Data S2.**  $^{13}\text{C}$  NMR spectrum (100 MHz,  $\text{CDCl}_3$ , TMS standard) of **1**, related to **Scheme S1**.  $^{13}\text{C}$  NMR (100 MHz,  $\text{CDCl}_3$ , TMS standard):  $\delta$  (ppm) 65.23, 120.02, 124.36, 125.20, 125.35, 125.54, 125.99, 126.11, 127.10, 127.18, 128.21, 128.59, 129.00, 129.95, 130.25, 130.43, 130.79, 138.15, 140.02, 140.37. HRMS(EI) Calcd for  $\text{C}_{23}\text{H}_{15}\text{BrO}$  [ $\text{M}^+$ ]:  $m/z$  386.0306, Found:  $m/z$  386.0312. Elemental analysis; Calcd for  $\text{C}_{23}\text{H}_{15}\text{BrO}$ : C 71.33, H 3.90, Found: C 71.28, H 4.10.

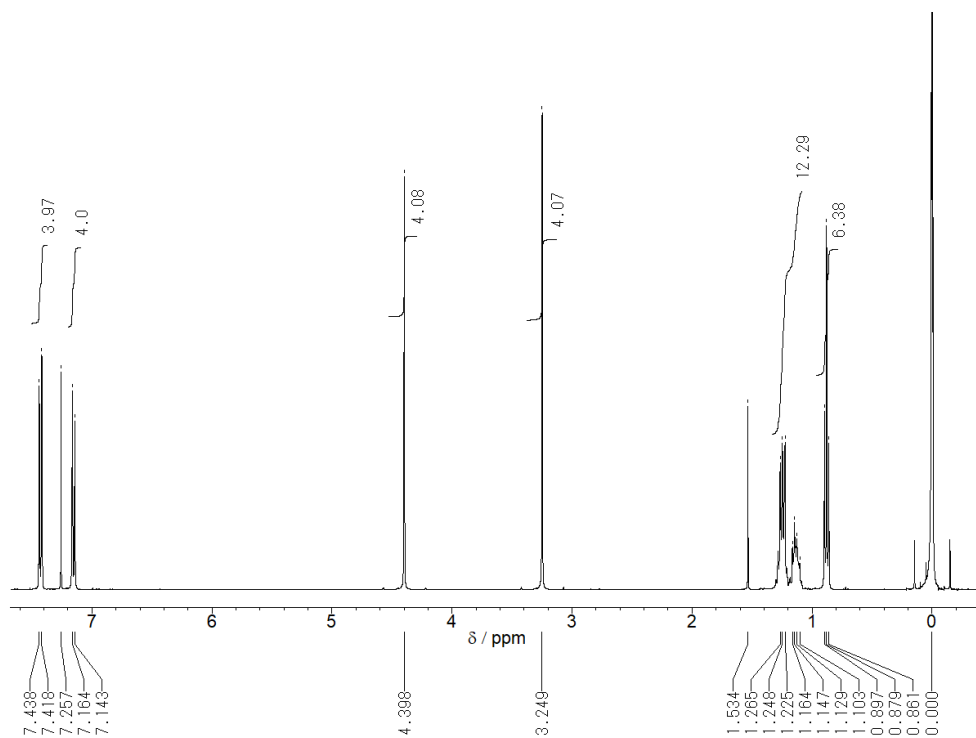

**Data S3.  $^1\text{H}$  NMR spectrum (400 MHz,  $\text{CDCl}_3$ , TMS standard) of **2**, related to Scheme S1.  $^1\text{H}$  NMR (400 MHz,  $\text{CDCl}_3$ , TMS standard):  $\delta$  (ppm) 0.88 (t,  $J = 7.2$  Hz, 6 H,  $\text{CH}_3$ ), 1.08-1.32 (m, 12 H,  $\text{CH}_2$ ), 3.25 (s, 4 H,  $\text{CH}_2$ ), 4.40 (s, 4 H,  $\text{CH}_2$ ), 7.15 (d,  $J = 8.3$  Hz, 4 H, ArH), 7.43 (d,  $J = 8.3$  Hz, 4 H, ArH).**

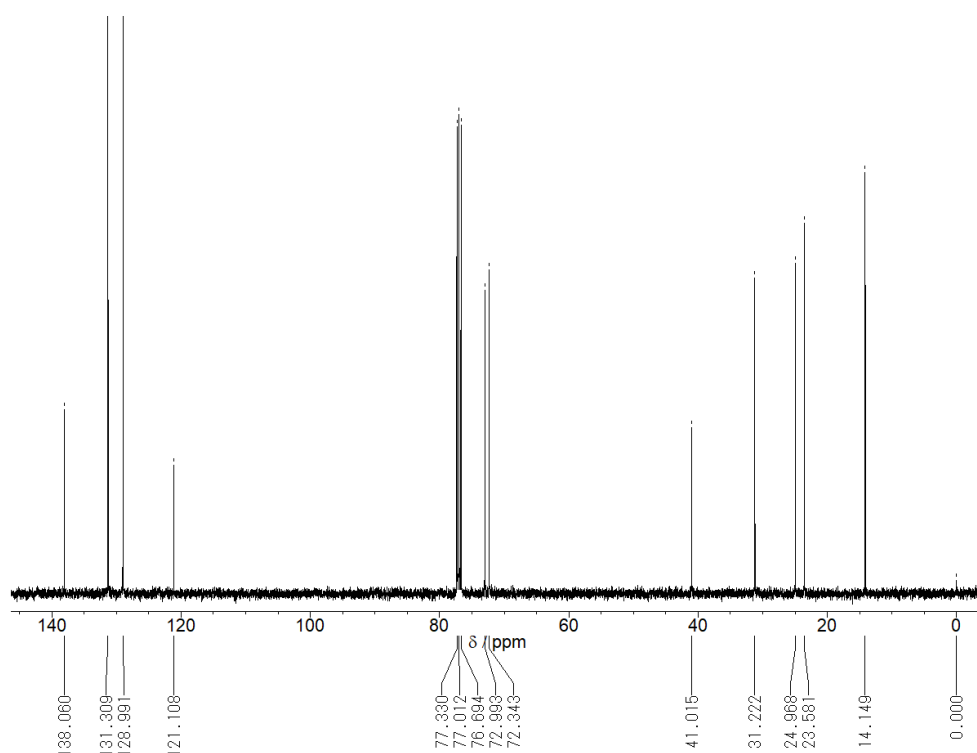

**Data S4.**  $^{13}\text{C}$  NMR spectrum (100 MHz,  $\text{CDCl}_3$ , TMS standard) of **2**, related to **Scheme S1**.  $^{13}\text{C}$  NMR (100 MHz,  $\text{CDCl}_3$ , TMS standard):  $\delta$  (ppm) 14.15, 23.58, 24.97, 31.22, 41.02, 72.34, 72.99, 121.11, 128.99, 131.31, 138.06. HRMS(EI) Calcd for  $\text{C}_{25}\text{H}_{34}\text{Br}_2\text{O}_2$  [ $\text{M}^+$ ]:  $m/z$  524.0926, Found:  $m/z$  524.0938. Elemental analysis; Calcd for  $\text{C}_{25}\text{H}_{34}\text{Br}_2\text{O}_2$ : C 57.05, H 6.51, Found: C 56.84, H 6.39.

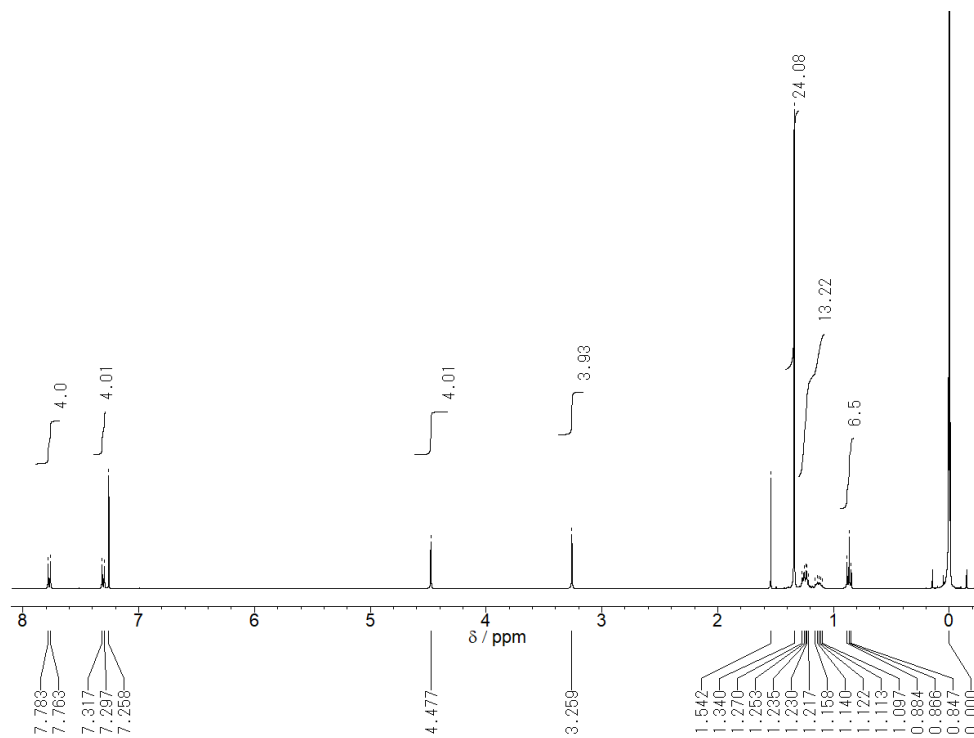

**Data S5.** <sup>1</sup>H NMR spectrum (400 MHz, CDCl<sub>3</sub>, TMS standard) of **3**, related to Scheme S1. <sup>1</sup>H NMR (400 MHz, CDCl<sub>3</sub>, TMS standard): δ (ppm) 0.87 (t, *J* = 7.3 Hz, 6 H, CH<sub>3</sub>), 1.08-1.30 (m, 12 H, CH<sub>2</sub>), 1.34 (s, 24 H, CH<sub>3</sub>), 3.26 (s, 4 H, CH<sub>2</sub>), 4.48 (s, 4 H, CH<sub>2</sub>), 7.31 (d, *J* = 8.1 Hz, 4 H, ArH), 7.77 (d, *J* = 8.1 Hz, 4 H, ArH).

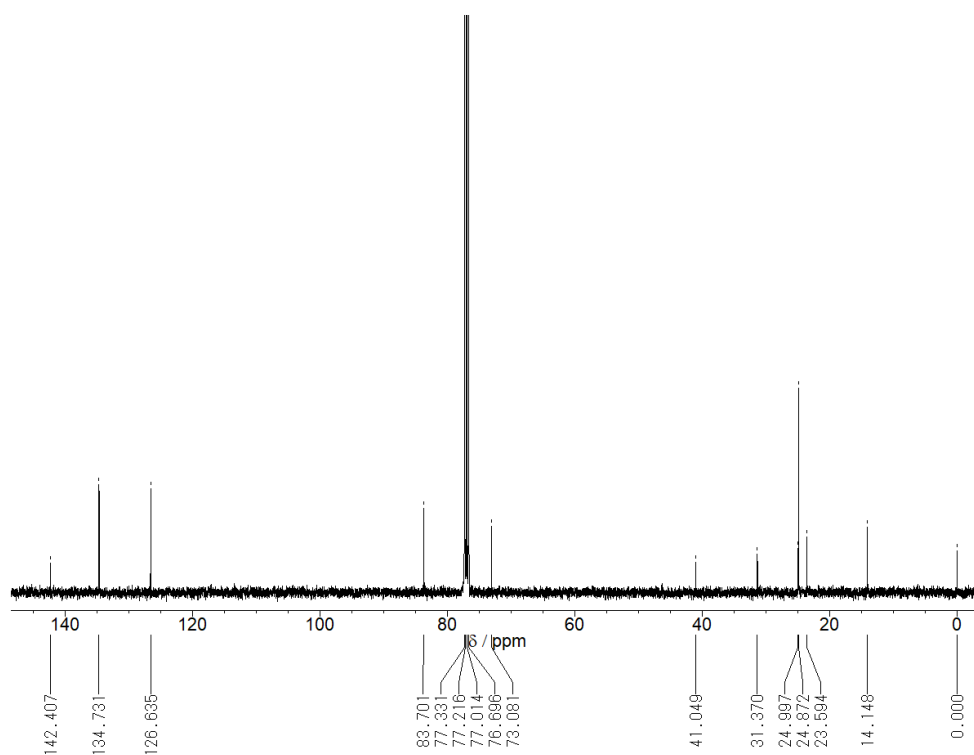

**Data S6.** <sup>13</sup>C NMR spectrum (100 MHz, CDCl<sub>3</sub>, TMS standard) of **3**, related to **Scheme S1**. <sup>13</sup>C NMR (100 MHz, CDCl<sub>3</sub>, TMS standard): δ (ppm) 14.15, 23.59, 24.87, 25.00, 31.37, 41.05, 73.08, 77.22, 83.70, 126.64, 134.73, 142.41. HRMS(FAB) Calcd for C<sub>37</sub>H<sub>59</sub>O<sub>6</sub>B<sub>2</sub> [(M+H)<sup>+</sup>]: m/z 621.4498, Found: m/z 621.4500.



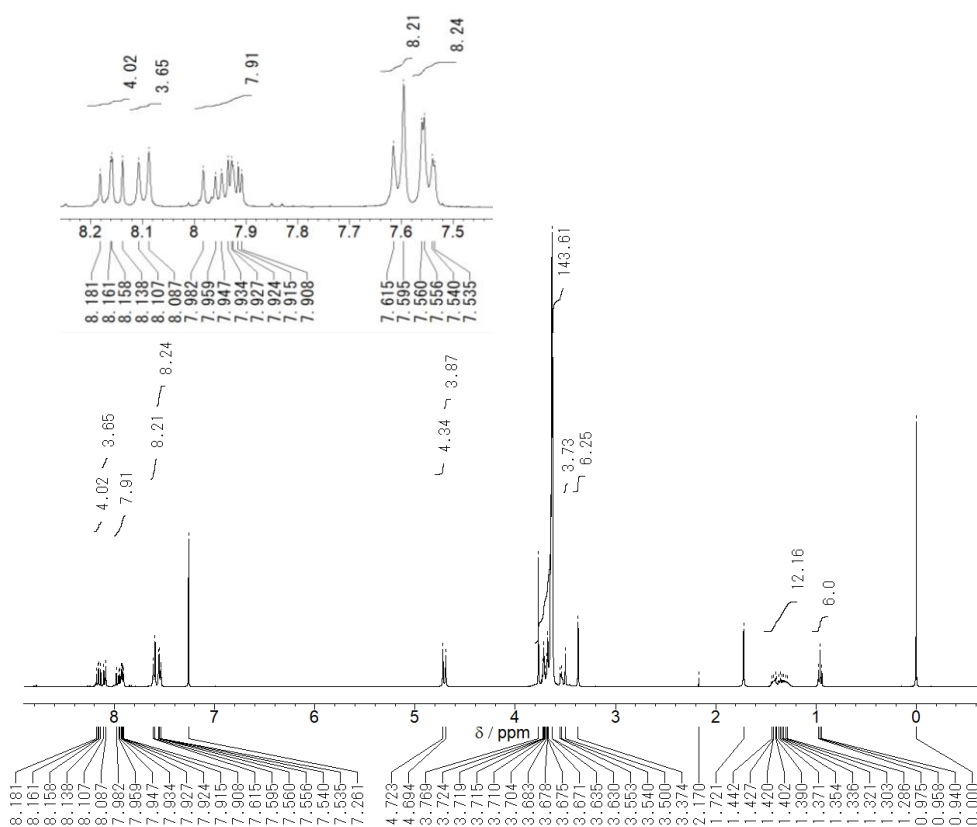

**Data S7.**  $^1\text{H}$  NMR spectrum (400 MHz,  $\text{CDCl}_3$ , TMS standard) of Pyr-A, related to Scheme S1.  $^1\text{H}$  NMR (400 MHz,  $\text{CDCl}_3$ , TMS standard):  $\delta$  (ppm) 0.96 (t,  $J = 7.0$  Hz, 6 H,  $\text{CH}_3$ ), 1.24-1.45 (m, 12 H,  $\text{CH}_2$ ), 3.37 (s, 6 H,  $\text{OCH}_3$ ), 3.50 (s, 4 H,  $\text{OCH}_2\text{CH}$ ), 3.52-3.80 (m, 144 H,  $\text{OCH}_2\text{CH}_2\text{O}$ ), 4.69 (s, 4 H,  $\text{OCH}_2\text{Ar}$ ), 4.72 (s, 4 H,  $\text{OCH}_2\text{Ar}$ ), 7.53-7.58 (8 H,  $\text{ArH}$ ), 7.61 (d,  $J = 8.0$  Hz, 8 H,  $\text{ArH}$ ), 7.90-7.99 (8 H,  $\text{ArH}$ ), 8.10 (d,  $J = 8.0$  Hz, 4 H,  $\text{ArH}$ ), 8.13-8.19 (4 H,  $\text{ArH}$ ).

**Table S1. Spectroscopic parameters of Pyr-A in various solvents, related to Figure 2.**

| solvent <sup>a</sup> | $\lambda_{\text{max}}^{\text{abs}}$ (nm) | $\varepsilon$ (M <sup>-1</sup> cm <sup>-1</sup> ) <sup>b</sup> | $\Phi_f$ | $\tau_M$ (ns) | $\tau_E$ (ns) | $I_{470/400}$ | $E_T(30)^c$ |
|----------------------|------------------------------------------|----------------------------------------------------------------|----------|---------------|---------------|---------------|-------------|
| benzene              | 359                                      | $7.6 \times 10^4$                                              | 0.46     | 3.9           | 4.2           | 0.29          | 34.3        |
| THF                  | 358                                      | $8.1 \times 10^4$                                              | 0.53     | 3.5           | 4.7           | 0.29          | 37.4        |
| CHCl <sub>3</sub>    | 359                                      | $8.0 \times 10^4$                                              | 0.48     | 3.7           | 5.1           | 0.28          | 39.1        |
| acetone              | 356                                      | $7.8 \times 10^4$                                              | 0.45     | 3.8           | 11            | 0.69          | 42.2        |
| DMSO                 | 360                                      | $8.0 \times 10^4$                                              | 0.47     | 4.5           | 9.5           | 0.39          | 45.1        |
| ACN                  | 356                                      | $8.0 \times 10^4$                                              | 0.39     | 4.5           | 12            | 1.17          | 45.6        |
| 1-OctOH              | 358                                      | $7.9 \times 10^4$                                              | 0.52     | 3.9           | 10            | 0.41          | 48.3        |
| 1-PrOH               | 357                                      | $8.1 \times 10^4$                                              | 0.47     | 4.1           | 10            | 0.67          | 50.7        |
| EtOH                 | 356                                      | $8.0 \times 10^4$                                              | 0.44     | 4.0           | 11            | 0.90          | 51.9        |
| MeOH                 | 356                                      | $8.0 \times 10^4$                                              | 0.40     | 4.2           | 12            | 1.54          | 55.4        |
| water                | 356                                      | $4.1 \times 10^4$                                              | 0.08     | 2.4           | 2.5           | 25.8          | 63.8        |

a THF: tetrahydrofuran; CHCl<sub>3</sub>: chloroform; DMSO: dimethylsulfoxide; ACN: acetonitrile; 1-OctOH : 1-octanol; 1-PrOH : 1-propanol; EtOH: ethanol; MeOH: methanol

b Measured at absorption peak wavelength

c Reichardt 1994

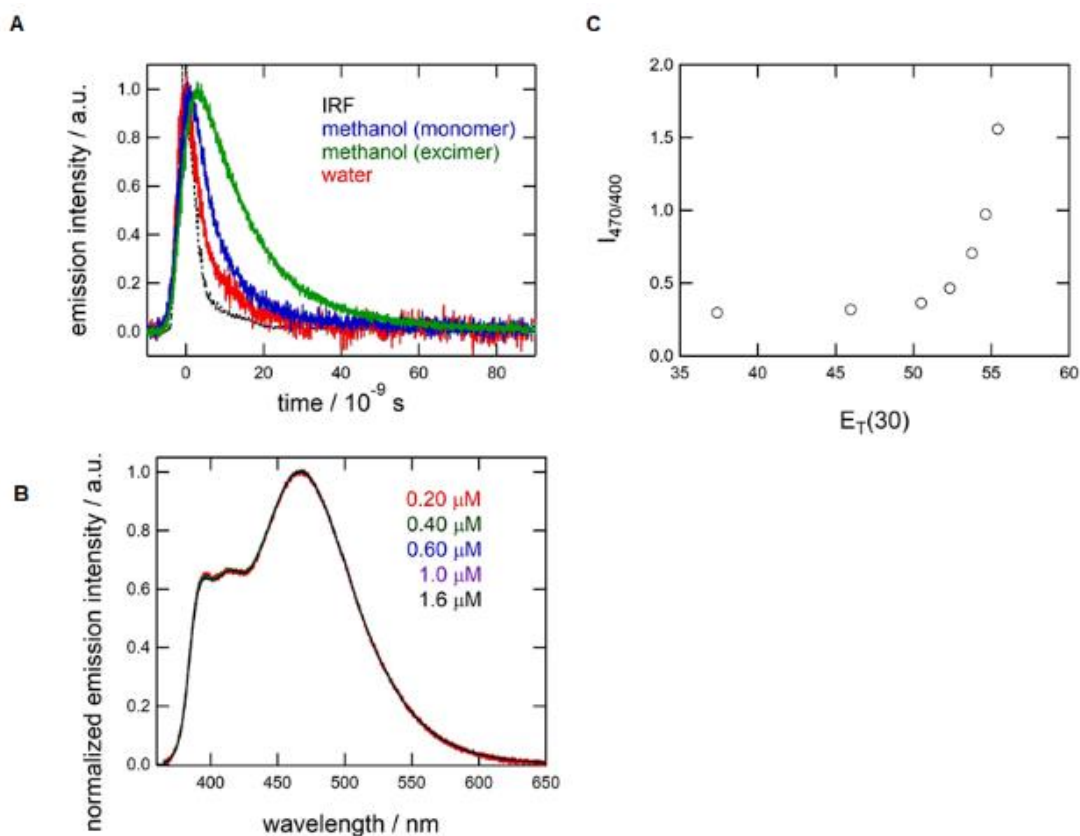

**Figure S1. *In Vitro* Spectroscopic Properties of Pyr-A**, related to **Figure 2**. (A) Time-resolved fluorescence curves of Pyr-A in methanol (blue, 400 nm; green, 470 nm) and water (red, 470 nm). A dotted curve is the instrumental response function (IRF). (B) Emission spectra of Pyr-A in methanol at 0.20, 0.40, 0.60, 1.0 and 1.6  $\mu$ M concentrations. (C) Fluorescence intensity ratio of excimer emission (at 470 nm) to monomer emission (at 400 nm),  $I_{470/400}$ , plotted against  $E_T(30)$  of binary mixed solvents of methanol and tetrahydrofuran.

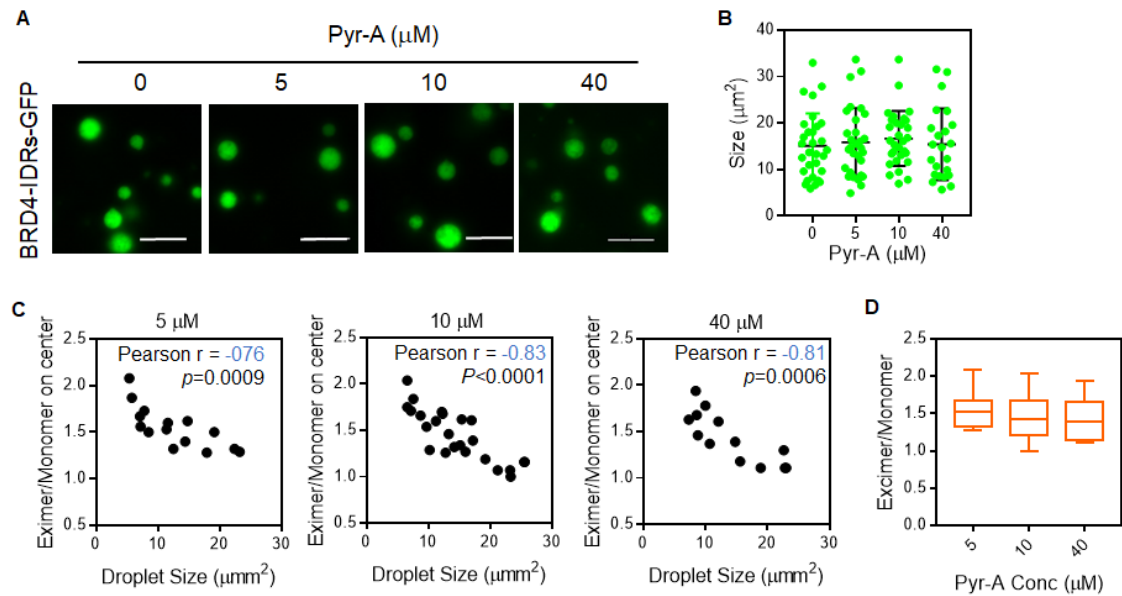

**Figure S2. The Size and E/M ratio Profiles of BRD4-IDR-mEGFP Droplets in The Presence of Different Concentration of Pyr-A,** related to **Figure 3.** (A) Representative image of BRD4-IDRs-GFP in the presence of different concentration of Pyr-A from the droplets formation assays. Bar=10 $\mu\text{m}$ . (B) Quantitative analysis was performed (Mean  $\pm$  SD; n=23-30). There is no statistical difference. (C) E/M ratio on the center of droplets was analyzed. Correlation analysis was performed using GraphPad Prism. (D) E/M values were quantified. Box plot element: medians with interquartile range and whiskers (min to max). There is no statistical difference between conditions.

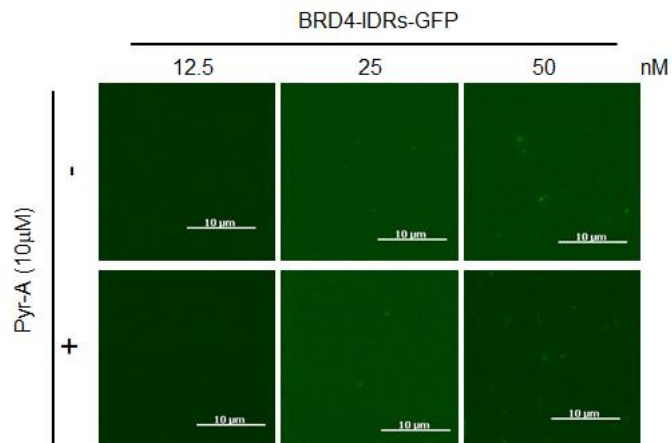

**Figure S3. The Effects of Pyr-A on The Csat of BRD4-IDR-mEGFP**, related to **Figure 3**. Droplets formation assay of BRD4-IDRs-GFP was performed in the absence of Pyr-A (Upper) or presence of Pyr-A (Lower). Csat is between 12.5 and 25 nM in the both conditions.

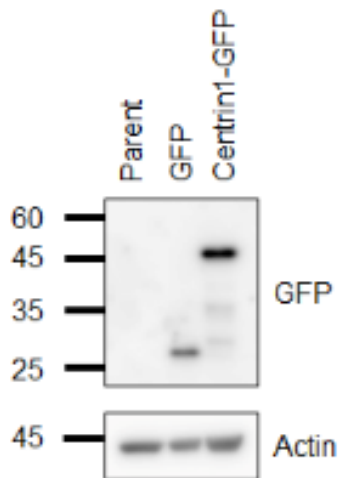

**Figure S4, The Expression of Exogenous Centrin1-GFP in HeLa Cells**, related to **Figure 4**. Western blotting analysis of centrin1-GFP protein levels. Lysate was obtained from parental cells (MOCK), GFP expressed cells or centrin1-GFP expressed cells. Cell lysates were subjected to SDS-PAGE and immunoblotting using anti-GFP antibody.
